# Supplementary material for: Procollagen-Lysine, 2-Oxoglutarate 5-Dioxygenase Family: Novel Prognostic Biomarkers and Tumor Microenvironment Regulators for Lower-Grade Glioma
Source: Front Cell Neurosci. 2022 Feb 18;16:838548. doi: 10.3389/fncel.2022.838548 (PMC8894330; doi:10.3389/fncel.2022.838548)
Supplement: Supplementary file 1 [file Table_2.xlsx]

## Sheet: Sheet1
Supplementary table S2. The top 100 PLODs-correlated gene
Gene Symbol	Gene ID	PCC
PLOD2	ENSG00000152952.11	0.83
SDF4	ENSG00000078808.16	0.82
IQGAP1	ENSG00000140575.12	0.8
SYDE1	ENSG00000105137.12	0.79
SERPINH1	ENSG00000149257.13	0.79
PDIA4	ENSG00000155660.10	0.78
FNDC3B	ENSG00000075420.12	0.78
SLC30A7	ENSG00000162695.11	0.77
DDOST	ENSG00000244038.9	0.77
AK2	ENSG00000004455.16	0.77
OSTC	ENSG00000198856.12	0.77
TXLNA	ENSG00000084652.15	0.77
LAMC1	ENSG00000135862.5	0.77
SLC39A1	ENSG00000143570.17	0.76
TMEM214	ENSG00000119777.18	0.76
RER1	ENSG00000157916.18	0.76
KDELR1	ENSG00000105438.8	0.76
CLIC1	ENSG00000213719.8	0.76
MRC2	ENSG00000011028.13	0.76
PYGL	ENSG00000100504.16	0.76
CCDC109B	ENSG00000005059.15	0.75
ANXA2	ENSG00000182718.16	0.75
COLGALT1	ENSG00000130309.10	0.75
PDIA3	ENSG00000167004.12	0.75
PLOD3	ENSG00000106397.11	0.75
NUCB1	ENSG00000104805.15	0.75
SH3GLB1	ENSG00000097033.14	0.75
TMED9	ENSG00000184840.11	0.74
RBMS1	ENSG00000153250.17	0.74
TUBA1C	ENSG00000167553.14	0.74
RIPK1	ENSG00000137275.13	0.74
SELENOF	ENSG00000183291.15	0.74
RPN2	ENSG00000118705.16	0.74
BCL2L12	ENSG00000126453.9	0.73
CD276	ENSG00000103855.17	0.73
PDPN	ENSG00000162493.16	0.73
IKBIP	ENSG00000166130.14	0.73
TAGLN2	ENSG00000158710.14	0.73
SEC24D	ENSG00000150961.14	0.73
CALU	ENSG00000128595.16	0.73
P3H1	ENSG00000117385.15	0.73
CAPZA1	ENSG00000116489.12	0.73
GNG5	ENSG00000174021.10	0.73
VASP	ENSG00000125753.13	0.73
FAM114A1	ENSG00000197712.11	0.72
CASP6	ENSG00000138794.9	0.72
CHPF2	ENSG00000033100.14	0.72
SEPN1	ENSG00000162430.16	0.72
GPX7	ENSG00000116157.5	0.72
P4HB	ENSG00000185624.14	0.72
MMP14	ENSG00000157227.12	0.72
ECE1	ENSG00000117298.14	0.72
ANXA2P2	ENSG00000231991.4	0.72
TMEM50A	ENSG00000183726.10	0.72
SP140L	ENSG00000185404.16	0.72
PIGT	ENSG00000124155.16	0.72
MSN	ENSG00000147065.16	0.71
SPATS2L	ENSG00000196141.12	0.71
MYL12A	ENSG00000101608.12	0.71
HDAC1	ENSG00000116478.11	0.71
CD58	ENSG00000116815.15	0.71
MGAT4B	ENSG00000161013.16	0.71
CTSA	ENSG00000064601.16	0.7
GSTK1	ENSG00000197448.13	0.7
EDEM2	ENSG00000088298.12	0.7
CEP89	ENSG00000121289.17	0.7
PDIA6	ENSG00000143870.12	0.7
FRMD8	ENSG00000126391.13	0.7
ZDHHC12	ENSG00000160446.18	0.7
ELK3	ENSG00000111145.7	0.7
GUSB	ENSG00000169919.16	0.7
OSMR	ENSG00000145623.12	0.7
FLNA	ENSG00000196924.14	0.7
COL5A2	ENSG00000204262.11	0.7
FKBP9	ENSG00000122642.10	0.7
NUDT19	ENSG00000213965.3	0.7
WDR1	ENSG00000071127.16	0.7
FAM46A	ENSG00000112773.15	0.7
ZNF217	ENSG00000171940.13	0.7
BCL10	ENSG00000142867.12	0.7
REST	ENSG00000084093.15	0.7
PFN1	ENSG00000108518.7	0.69
DAP	ENSG00000112977.15	0.69
LOXL3	ENSG00000115318.11	0.69
HDAC7	ENSG00000061273.17	0.69
CALD1	ENSG00000122786.19	0.69
MUL1	ENSG00000090432.6	0.69
KDELR2	ENSG00000136240.9	0.69
TMEM8A	ENSG00000129925.10	0.69
CD164	ENSG00000135535.14	0.69
FUCA2	ENSG00000001036.13	0.69
RHOC	ENSG00000155366.16	0.69
TRAM1	ENSG00000067167.7	0.69
HSP90B1	ENSG00000166598.12	0.69
FHL3	ENSG00000183386.9	0.69
PHTF1	ENSG00000116793.15	0.69
MAGOH	ENSG00000162385.10	0.69
LATS2	ENSG00000150457.8	0.69
EHD2	ENSG00000024422.11	0.69
FAM109B	ENSG00000177096.8	0.68
